# Supplementary material for: Tumor-Infiltrating T Cells in EBV-Associated Gastric Carcinomas Exhibit High Levels of Multiple Markers of Activation, Effector Gene Expression, and Exhaustion
Source: MDPI journal article supplement (doi:10.3390/v15010176), 2023-01-07
Supplement: s1 [file s1]

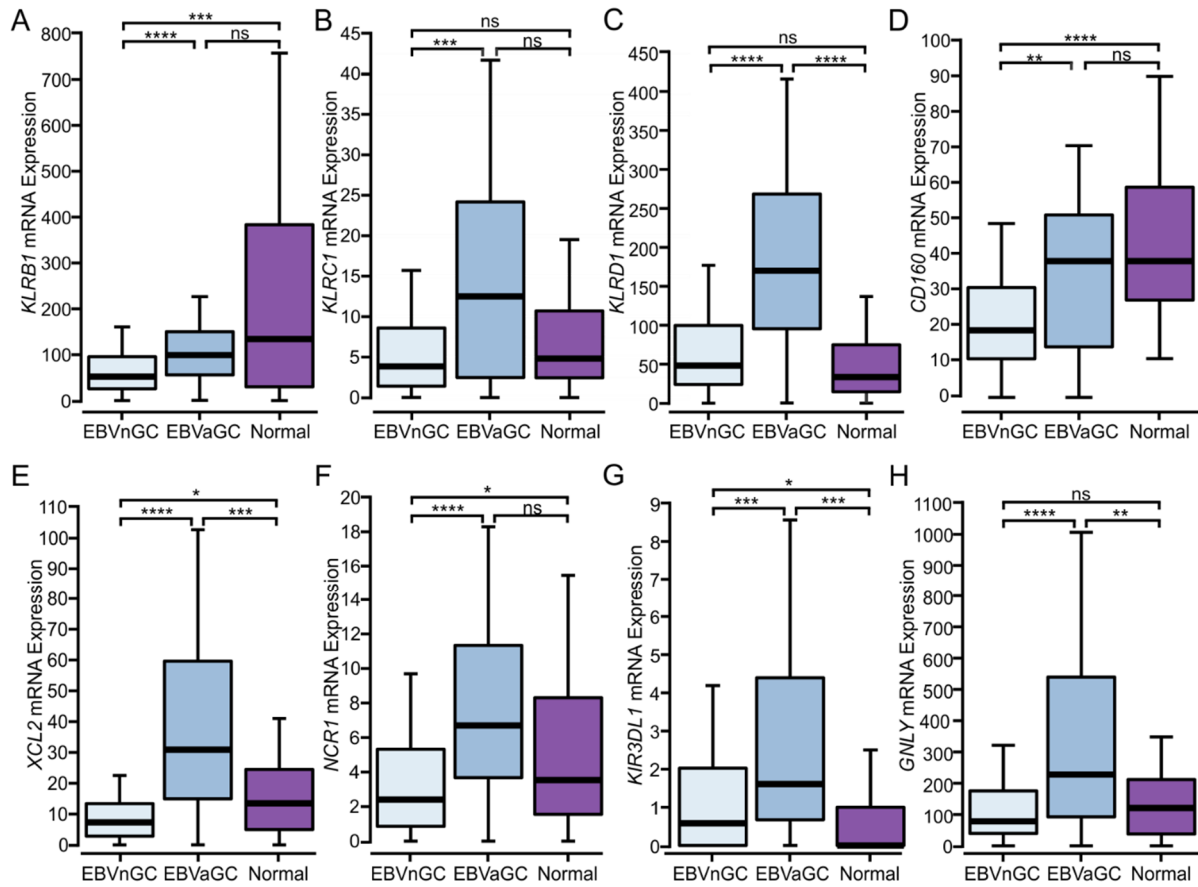

**Figure S1.** Transcript levels of NK cell marker genes in EBV-positive (EBVaGC) and EBV-negative (EBVnGC) gastric cancers. \*\*\*\*  $p \leq 0.0001$ , \*\*\*  $p \leq 0.001$ , \*\*  $p \leq 0.01$ , \*  $p = 0.05$ , ns - not significant.
